# Supplementary material for: Genomic Insights on the Functional Capabilities of the Cyano-Sphere of Edible Andean Nostoc Macrocolonies (Llayta)
Source: Preprints.org preprint supplement (doi:10.20944/preprints202202.0189.v1), 2022-02-15
Supplement: Supplementary file 3 [file supplementary]

Genomic insights on the functional capabilities of the cyanosphere of edible Andean *Nostoc* macrocolonies (Llayta)

Claudia Vilo1, Alexandra Galetovic1, Qunfeng Dong2, Benito Gómez-Silva1*

1 Laboratory of Biochemistry, Biomedical Department, Health Sciences Faculty and Centre for Biotechnology and Bioengineering (CeBiB), Universidad de Antofagasta, Antofagasta, Chile; [claudiavilo@gmail.com](mailto:claudiavilo@gmail.com); [alexandra.galetovic@uantof.cl](mailto:alexandra.galetovic@uantof.cl); [benito.gomez@uantof.cl](mailto:benito.gomez@uantof.cl)

2 Center for Biomedical Informatics, Department of Medicine, Stritch School of Medicine, Loyola University of Chicago, Maywood, Illinois, USA; [qdong@luc.edu](mailto:qdong@luc.edu)

***** Correspondence: [benito.gomez@uantof.cl](mailto:benito.gomez@uantof.cl)


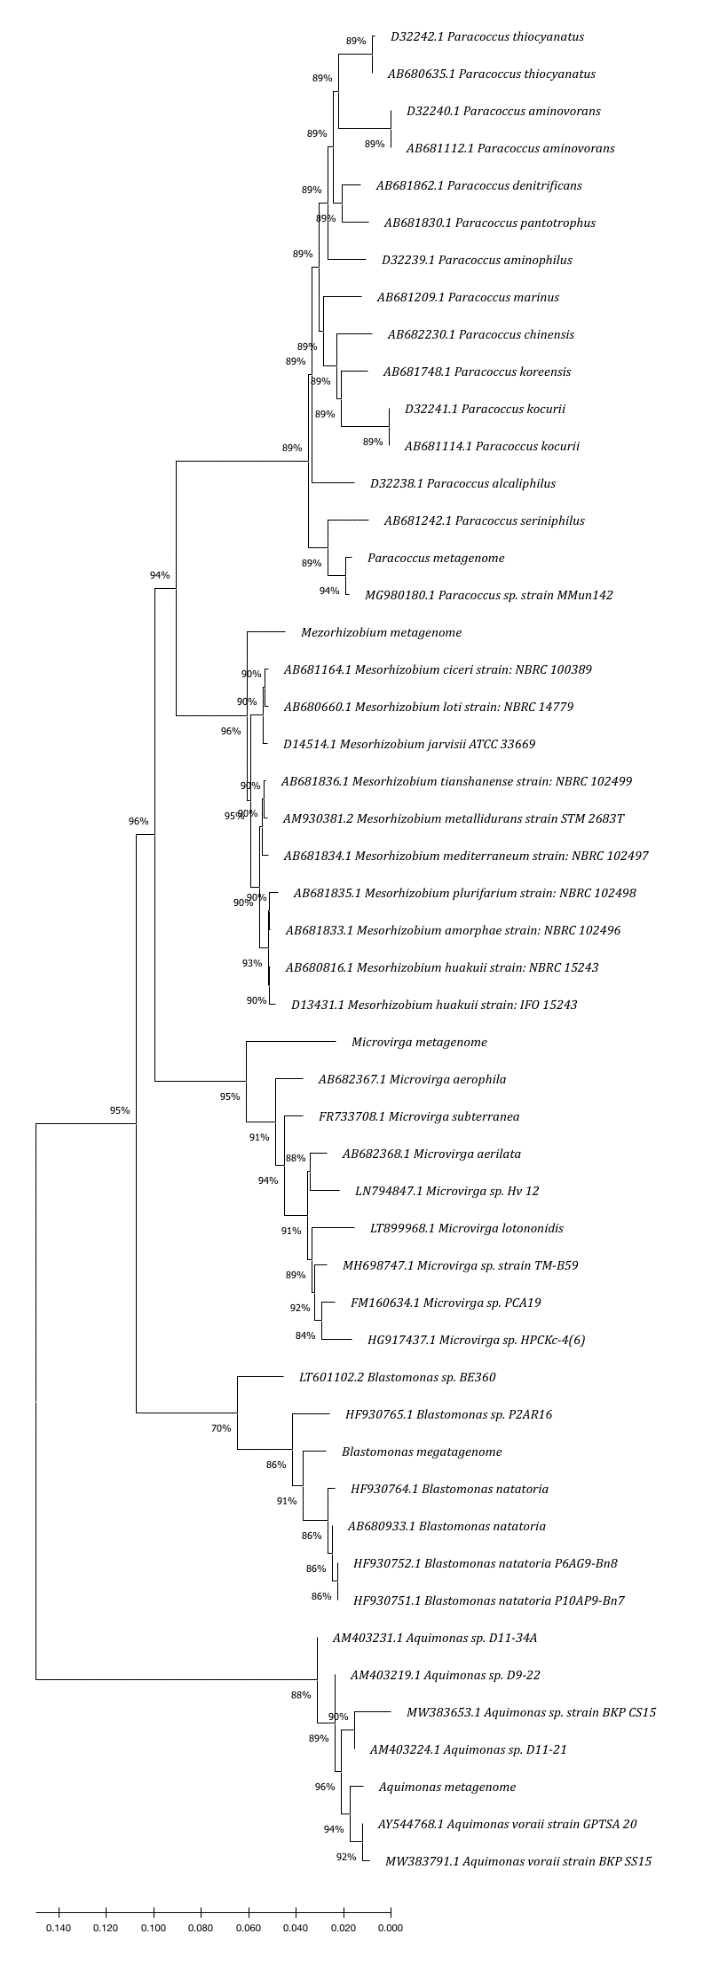


*Paracoccus*

*Mezorhizobium*

*Microvirga*

*Blastomonas*

*Aquimonas*

Supplementary Figure S1. Phylogenetic tree of 16S rRNA gene depicting clades of the five assembled bacteria genera, *Aquimonas*, *Blastomonas*, *Microvirga*, *Mezorhizobium*, and *Paracoccus*.
